# Supplementary material for: The combination of four molecular markers improves thyroid cancer cytologic diagnosis and patient management
Source: Springer Nature journal article supplement (doi:10.1186/s12885-015-1917-2), 2015-11-19
Supplement: MOESM1 [file 9745618]

**Table S1:** set of primers used for genes analyses.

| PRIMERS FOR EXPRESSION STUDY |                              |                                         |
|------------------------------|------------------------------|-----------------------------------------|
| NAME                         | SEQUENCE (5'-3')             | Annealing temperature (C <sup>0</sup> ) |
| KIT F                        | GCACCTGCTGCTGAAATGTATGACATAT | 60                                      |
| KIT R                        | TTTGCTAAGTTGGAGTAAATATGATTGG | 60                                      |
| TC1 F                        | AAATCTTCTGACTAATGCTAAAACG    | 60                                      |
| TC1 R                        | TTATTGTTGCATGACATTTGC        | 60                                      |
| B2M F                        | CATTCCTGAAGCTGACAGCATTC      | 60                                      |
| B2M R                        | TGCTGGATGACGTGAGTAAACC       | 60                                      |
