# Supplementary material for: The combination of four molecular markers improves thyroid cancer cytologic diagnosis and patient management
Source: Springer Nature journal article supplement (doi:10.1186/s12885-015-1917-2), 2015-11-19
Supplement: MOESM2 [file 9745618]

**Table S2: Scores list of Discriminant Analysis.**

The classification table lists the two highest scores amongst the classification functions for each of the 51 observations used to fit the model, as well as for any new observations. The discriminating function with  $p$ -value less than 0.05 is considered statistically significant at the 95.0% confidence level.

| Row | Actual Group | Highest Group | Highest Value | Squared Distance | Prob.  | 2nd Highest Group | 2nd Highest Value | Squared Distance | Prob.  |
|-----|--------------|---------------|---------------|------------------|--------|-------------------|-------------------|------------------|--------|
| 1   | 1            | 1             | -0.996281     | 0.0704307        | 0.8839 | 0                 | -3.02616          | 4.13018          | 0.1161 |
| 2   | 1            | 1             | -1.24553      | 0.126248         | 0.8610 | 0                 | -3.06878          | 3.77276          | 0.1390 |
| 3   | 1            | 1             | -1.13294      | 0.995233         | 0.5860 | 0                 | -1.4804           | 1.69015          | 0.4140 |
| 4   | 1            | 1             | -0.146934     | 0.0000101817     | 0.9329 | 0                 | -2.77925          | 5.26464          | 0.0671 |
| 5   | 1            | 1             | 0.444883      | 0.0586689        | 0.9607 | 0                 | -2.7513           | 6.45104          | 0.0393 |
| 6   | 1            | 1             | 0.959299      | 0.116463         | 0.9684 | 0                 | -2.46447          | 6.964            | 0.0316 |
| 7   | 1            | 1             | -0.0437119    | 0.0456246        | 0.8956 | 0                 | -2.19258          | 4.34336          | 0.1044 |
| 8   | 1            | 1             | -0.35565      | 0.0060648        | 0.9213 | 0                 | -2.81636          | 4.92749          | 0.0787 |
| 9   | 1            | 1             | -0.772161     | 0.236599         | 0.8208 | 0                 | -2.29419          | 3.28065          | 0.1792 |
| 10  | 1            | 1             | -0.909852     | 0.173664         | 0.8432 | 0                 | -2.59199          | 3.53794          | 0.1568 |
| 11  | 1            | 1             | -0.978737     | 0.0830749        | 0.8784 | 0                 | -2.95613          | 4.03787          | 0.1216 |
| 12  | 1            | 1             | -0.0884061    | 0.000111853      | 0.9318 | 0                 | -2.70375          | 5.23081          | 0.0682 |
| 13  | 1            | 1             | 2.95808       | 0.500472         | 0.9861 | 0                 | -1.30703          | 9.0307           | 0.0139 |
| 14  | 1            | 1             | 4.42059       | 3.26349          | 0.9989 | 0                 | -2.36984          | 16.8443          | 0.0011 |
| 15  | 1            | 1             | -1.18884      | 0.124011         | 0.8618 | 0                 | -3.01936          | 3.78505          | 0.1382 |
| 16  | 1            | 1             | 0.893555      | 0.0104766        | 0.9466 | 0                 | -1.98127          | 5.76013          | 0.0534 |
| 17  | 1            | 1             | -0.768977     | 0.0310464        | 0.9033 | 0                 | -3.00378          | 4.50064          | 0.0967 |
| 18  | 1            | 1             | 1.50373       | 0.117109         | 0.9685 | 0                 | -1.92221          | 6.96899          | 0.0315 |
| 19  | 1            | 1             | -1.33819      | 0.566862         | 0.7129 | 0                 | -2.24791          | 2.38631          | 0.2871 |
| 20  | 1            | 1             | -0.644114     | 0.0165925        | 0.9124 | 0                 | -2.98779          | 4.70395          | 0.0876 |
| 21  | 1            | 1             | -1.00743      | 0.0899351        | 0.8755 | 0                 | -2.95803          | 3.99113          | 0.1245 |
| 22  | 1            | 1             | -0.614894     | 0.0297171        | 0.9041 | 0                 | -2.85845          | 4.51684          | 0.0959 |
| 23  | 1            | 1             | -0.83946      | 0.0455392        | 0.8956 | 0                 | -2.98879          | 4.34419          | 0.1044 |
| 24  | 1            | 1             | 1.28208       | 0.247275         | 0.9777 | 0                 | -2.50012          | 7.81169          | 0.0223 |
| 25  | 1            | 1             | -0.355491     | 0.000281892      | 0.9309 | 0                 | -2.95656          | 5.20242          | 0.0691 |
| 26  | 1            | 1             | -1.23095      | 0.141747         | 0.8550 | 0                 | -3.00554          | 3.69093          | 0.1450 |
| 27  | 1            | 1             | -0.809608     | 0.0373955        | 0.8998 | 0                 | -3.00494          | 4.42805          | 0.1002 |
| 28  | 1            | 1             | 1.39246       | 0.073457         | 0.9631 | 0                 | -1.86993          | 6.59823          | 0.0369 |
| 29  | 1            | 1             | 2.73132       | 1.06855          | 0.9934 | 0                 | -2.28344          | 11.0981          | 0.0066 |
| 30  | 0            | 0             | 10.64         | 14.3598          | 1.0000 | 1                 | -0.706503         | 37.0528          | 0.0000 |
| 31  | 0            | 0             | -0.462702     | 1.20031          | 0.5306 | 1                 | -0.585055         | 1.44501          | 0.4694 |
| 32  | 0            | 0             | 0.644535      | 0.145789         | 0.8535 | 1                 | -1.11781          | 3.67048          | 0.1465 |
| 33  | 0            | 0             | 7.67354       | 5.9752           | 0.9997 | 1                 | -0.582584         | 22.4875          | 0.0003 |
| 34  | 0            | *1            | -1.19548      | 1.03641          | 0.5746 | 0                 | -1.496            | 1.63745          | 0.4254 |
| 35  | 0            | 0             | 8.1872        | 7.8541           | 0.9999 | 1                 | -0.891717         | 26.0119          | 0.0001 |
| 36  | 0            | 0             | 0.546552      | 0.166674         | 0.8457 | 1                 | -1.15506          | 3.56989          | 0.1543 |
| 37  | 0            | *1            | -1.33338      | 0.177548         | 0.8418 | 0                 | -3.00488          | 3.52053          | 0.1582 |
| 38  | 0            | *1            | -1.31058      | 0.713334         | 0.6680 | 0                 | -2.00964          | 2.11145          | 0.3320 |
| 39  | 1            | 1             | -0.965599     | 0.0847317        | 0.8777 | 0                 | -2.93642          | 4.02638          | 0.1223 |
| 40  | 0            | 0             | 2.60575       | 0.00221143       | 0.9263 | 1                 | 0.0741535         | 5.06541          | 0.0737 |
| 41  | 1            | 1             | 0.0980452     | 0.0137514        | 0.9483 | 0                 | -2.81104          | 5.83193          | 0.0517 |
| 42  | 1            | 1             | 0.122645      | 0.00124895       | 0.9382 | 0                 | -2.5982           | 5.44295          | 0.0618 |
| 43  | 1            | 1             | -0.62535      | 0.0207164        | 0.9096 | 0                 | -2.93429          | 4.6386           | 0.0904 |
| 44  | 1            | 1             | 2.17636       | 0.60257          | 0.9881 | 0                 | -2.24687          | 9.44902          | 0.0119 |
| 45  | 1            | 1             | -0.715366     | 0.0282095        | 0.9050 | 0                 | -2.9691           | 4.53569          | 0.0950 |
| 46  | 1            | 1             | 1.13048       | 0.33086          | 0.9813 | 0                 | -2.8308           | 8.25342          | 0.0187 |
| 47  | 1            | 1             | -1.31618      | 0.161647         | 0.8476 | 0                 | -3.03204          | 3.59337          | 0.1524 |
| 48  | 1            | 1             | -0.200962     | 0.00208922       | 0.9265 | 0                 | -2.73559          | 5.07134          | 0.0735 |
| 49  | 0            | 0             | -0.517045     | 0.922166         | 0.6066 | 1                 | -0.950252         | 1.78858          | 0.3934 |
| 50  | 0            | 0             | 0.835918      | 0.100527         | 0.8711 | 1                 | -1.07523          | 3.92283          | 0.1289 |
| 51  | 0            | *1            | -1.31641      | 1.16719          | 0.5393 | 0                 | -1.47373          | 1.48184          | 0.4607 |

\* = incorrectly classified.0 benign, 1 malignant.
